# Supplementary material for: A series of coordination polymers constructed by a flexible tetracarboxylic acid: synthesis, structural diversity and luminescent properties
Source: Royal Society of Chemistry journal article supplement (doi:10.1039/c3ce42127a), 2013-12-19
Supplement: c3ce42127a.pdf [file c3ce42127a.pdf]

# A series of coordination polymers constructed by a flexible tetracarboxylic acid: synthesis, structural diversity and luminescent properties

Chunmei Jia,<sup>a</sup> Qiang lin<sup>\*b</sup> and Wenbing Yuan<sup>\*a,b</sup>

**Table S1** Selected bond lengths (Å) and angles (deg) for compounds H<sub>4</sub>L, and **1-10**

|                                                                                                          |            |                     |            |                    |            |
|----------------------------------------------------------------------------------------------------------|------------|---------------------|------------|--------------------|------------|
| <b>H<sub>4</sub>L</b>                                                                                    |            |                     |            |                    |            |
| O(1)-C(23)                                                                                               | 1.271(3)   | O(2)-C(23)          | 1.265(2)   | O(6)-C16(3)        | 1.261(3)   |
| O(3)-C(24)                                                                                               | 1.273(3)   | O(8)-C(15)          | 1.267(3)   | O(4)-C(24)         | 1.253(3)   |
| O(7)-C(15)                                                                                               | 1.273(2)   |                     |            |                    |            |
| <b>Complex 1</b>                                                                                         |            |                     |            |                    |            |
| N(4)#3 -Cu(1)                                                                                            | 2.008(3)   | N(6)#4-Cu(1)        | 2.028(3)   | N(4)#1-Cu(1)-N(5)  | 115.19(13) |
| N(4)#1-Cu(1)-N(6)#2                                                                                      | 104.68(12) | N(5)-Cu(1)-N(6)#2   | 113.12(10) | N(4)#1-Cu(1)-N(3)  | 112.50(12) |
| N(5)-Cu(1)-N(3)                                                                                          | 101.28(12) | N(6)#2-Cu(1)-N(3)   | 110.26(12) |                    |            |
| Symmetry code: #1 -x+1/2, -y+1/2, z+1/2; #2 x-1/2, -y, z+1/2; #3 x-1/2, -y+1, z-1/2; #4 x+1/2, -y, z-1/2 |            |                     |            |                    |            |
| <b>Complex 2</b>                                                                                         |            |                     |            |                    |            |
| Cd(1)-O(4)#1                                                                                             | 2.308(3)   | Cd(1)-O(3)#2        | 2.333(3)   | Cd(1)-N(2)         | 2.339(4)   |
| Cd(1)-O(1)                                                                                               | 2.355(3)   | Cd(1)-N(1)          | 2.381(4)   | Cd(1)-O(2)         | 2.466(3)   |
| O(4)#1-Cd(1)-O(3)#2                                                                                      | 102.22(13) | O(4)#1-Cd(1)-N(2)   | 135.16(12) | O(3)#2-Cd(1)-N(2)  | 84.67(11)  |
| O(4)#1-Cd(1)-O(1)                                                                                        | 82.78(12)  | O(3)#2-Cd(1)-O(1)   | 107.23(13) | N(2)-Cd(1)-O(1)    | 137.96(12) |
| O(4)#1-Cd(1)-N(1)                                                                                        | 88.41(14)  | O(3)#2-Cd(1)-N(1)   | 151.67(12) | N(2)-Cd(1)-N(1)    | 69.75(13)  |
| O(1)-Cd(1)-N(1)                                                                                          | 100.07(14) | O(4)#1-Cd(1)-O(2)   | 136.72(10) | O(3)#2-Cd(1)-O(2)  | 90.93(12)  |
| N(2)-Cd(1)-O(2)                                                                                          | 86.53(12)  | O(1)-Cd(1)-O(2)     | 53.96(11)  | N(1)-Cd(1)-O(2)    | 99.20(13)  |
| Symmetry code: #1 x-1,y,z; #2 -x+1,y,-z+1/2; #3 x+1,y,z; #4 -x+1,-y,-z; #5 -x,-y+1,-z+2                  |            |                     |            |                    |            |
| <b>Complex 3</b>                                                                                         |            |                     |            |                    |            |
| Cd(1)-O(1W)                                                                                              | 2.301(9)   | Cd(1)-O(2W)         | 2.306(8)   | Cd(1)-O(3W)        | 2.338(8)   |
| Cd(1)-O(1)                                                                                               | 2.371(6)   | Cd(1)-O(4)#1        | 2.376(6)   | Cd(1)-O(2)         | 2.414(7)   |
| Cd(1)-O(3)#1                                                                                             | 2.440(7)   |                     |            |                    |            |
| O(1W)-Cd(1)-O(2W)                                                                                        | 83.6(4)    | O(1W)-Cd(1)-O(3W)   | 171.4(3)   | O(2W)-Cd(1)-O(3W)  | 91.4(4)    |
| O(1W)-Cd(1)-O(1)                                                                                         | 101.8(3)   | O(2W)-Cd(1)-O(1)    | 138.1(3)   | O(3W)-Cd(1)-O(1)   | 86.6(3)    |
| O(1W)-Cd(1)-O(4)#1                                                                                       | 88.3(3)    | O(2W)-Cd(1)-O(4)#1  | 138.7(3)   | O(3W)-Cd(1)-O(4)#1 | 90.9(3)    |
| O(1)-Cd(1)-O(4)#1                                                                                        | 83.2(2)    | O(1W)-Cd(1)-O(2)    | 90.0(3)    | O(2W)-Cd(1)-O(2)   | 83.8(3)    |
| O(3W)-Cd(1)-O(2)                                                                                         | 96.4(3)    | O(1)-Cd(1)-O(2)     | 55.0(2)    | O(4)#1-Cd(1)-O(2)  | 136.8(2)   |
| O(1W)-Cd(1)-O(3)#1                                                                                       | 87.6(3)    | O(2W)-Cd(1)-O(3)#1  | 85.0(3)    | O(3W)-Cd(1)-O(3)#1 | 85.0(3)    |
| O(1)-Cd(1)-O(3)#1                                                                                        | 136.3(2)   | O(4)#1-Cd(1)-O(3)#1 | 54.2(2)    | O(2)-Cd(1)-O(3)#1  | 168.8(2)   |
| Symmetry code: #1 -x+1/2,y-1/2,-z+1/2; #2 -x+1,-y+1,-z; #3 -x+1/2,y+1/2,-z+1/2                           |            |                     |            |                    |            |
| <b>Complex 4</b>                                                                                         |            |                     |            |                    |            |

|                                                                                  |            |                     |            |                     |            |
|----------------------------------------------------------------------------------|------------|---------------------|------------|---------------------|------------|
| Mn(1)-O(4)#2                                                                     | 2.271(4)   | Mn(1)-O(3) #1       | 2.367(4)   | Mn(1)-O(3W)         | 2.176(4)   |
| Mn(1)-O(2W)                                                                      | 2.195(5)   | Mn(1)-O(1W)         | 2.201(4)   | Mn(1)-O(2)          | 2.241(4)   |
| Mn(1)-O(1)                                                                       | 2.396(4)   |                     |            |                     |            |
| O(3W)-Mn(1)-O(2W)                                                                | 172.13(17) | O(3W)-Mn(1)-O(1W)   | 85.28(16)  | O(2W)-Mn(1)-O(1W)   | 90.14(18)  |
| O(3W)-Mn(1)-O(2)                                                                 | 88.60(15)  | O(2W)-Mn(1)-O(2)    | 91.20(18)  | O(1W)-Mn(1)-O(2)    | 142.80(15) |
| O(3W)-Mn(1)-O(4)#2                                                               | 101.58(15) | O(2W)-Mn(1)-O(4)#2  | 86.15(17)  | O(1W)-Mn(1)-O(4)#2  | 136.06(16) |
| O(2)-Mn(1)-O(4)#2                                                                | 81.10(14)  | O(3W)-Mn(1)-O(3)#2  | 88.99(16)  | O(2W)-Mn(1)-O(3)#2  | 96.64(19)  |
| O(1W)-Mn(1)-O(3)#2                                                               | 81.17(15)  | O(2)-Mn(1)-O(3)#2   | 135.45(14) | O(4)#2-Mn(1)-O(3)#2 | 55.95(14)  |
| O(3W)-Mn(1)-O(1)                                                                 | 87.82(17)  | O(2W)-Mn(1)-O(1)    | 85.54(19)  | O(1W)-Mn(1)-O(1)    | 86.89(15)  |
| O(2)-Mn(1)-O(1)                                                                  | 56.19(13)  | O(4)#2-Mn(1)-O(1)   | 136.19(13) | O(3)#2-Mn(1)-O(1)   | 167.85(13) |
| Symmetry code: #1 -x+1/2,y+1/2,-z+3/2; #2 -x+1/2,y-1/2,-z+3/2; #3 -x+1,-y,-z+2   |            |                     |            |                     |            |
| <b>Complex 5</b>                                                                 |            |                     |            |                     |            |
| Co(1)-O(4) #1                                                                    | 2.372(5)   | Co(1)-O(3) #1       | 2.275(4)   | Co(1)-O(2W)         | 2.177(4)   |
| Co(1)-O(1W)                                                                      | 2.189(5)   | Co(1)-O(3W)         | 2.210(4)   | Co(1)-O(1)          | 2.247(4)   |
| Co(1)-O(2)                                                                       | 2.398(4)   |                     |            |                     |            |
| O(2W)-Co(1)-O(1W)                                                                | 172.08(17) | O(2W)-Co(1)-O(3W)   | 84.94(16)  | O(1W)-Co(1)-O(3W)   | 90.38(18)  |
| O(2W)-Co(1)-O(1)                                                                 | 88.76(15)  | O(1W)-Co(1)-O(1)    | 91.11(18)  | O(3W)-Co(1)-O(1)    | 142.66(15) |
| O(2W)-Co(1)-O(3)#3                                                               | 101.27(16) | O(1W)-Co(1)-O(3)#3  | 86.52(17)  | O(3W)-Co(1)-O(3)#3  | 136.24(17) |
| O(1)-Co(1)-O(3)#3                                                                | 81.08(14)  | O(2W)-Co(1)-O(4)#3  | 89.26(16)  | O(1W)-Co(1)-O(4)#3  | 96.3(2)    |
| O(3W)-Co(1)-O(4)#3                                                               | 81.07(16)  | O(1)-Co(1)-O(4)#3   | 135.70(15) | O(3)#3-Co(1)-O(4)#3 | 56.04(15)  |
| O(2W)-Co(1)-O(2)                                                                 | 87.68(17)  | O(1W)-Co(1)-O(2)    | 85.7(2)    | O(3W)-Co(1)-O(2)    | 86.81(15)  |
| O(1)-Co(1)-O(2)                                                                  | 56.14(13)  | O(3)#3-Co(1)-O(2)   | 136.24(14) | O(4)#3-Co(1)-O(2)   | 167.71(14) |
| Symmetry code: #1 -x+1/2,y+1/2,-z+1/2; #2 -x+1,-y,-z; #3 -x+1/2,y-1/2,-z+1/2     |            |                     |            |                     |            |
| <b>Complex 6</b>                                                                 |            |                     |            |                     |            |
| Zn(1)-O(1)#2                                                                     | 1.970(3)   | Zn(1)-O(4)          | 1.986(3)   | Zn(1)-N(2)          | 2.058(3)   |
| Zn(1)-N(3)                                                                       | 2.105(3)   |                     |            |                     |            |
| O(4)-Zn(1)-O(1)#2                                                                | 104.71(12) | N(3)-Zn(1)-O(4)     | 130.69(12) | N(3)-Zn(1)-N(2)     | 79.65(12)  |
| N(2)-Zn(1)-O(1)#2                                                                | 120.58(12) | N(3)-Zn(1)-O(1)#2   | 109.18(12) | N(2)-Zn(1)-O(4)     | 112.04(11) |
| <b>Complex 7</b>                                                                 |            |                     |            |                     |            |
| Zn(1)-O(3) #1                                                                    | 1.938(3)   | Zn(1)-O(1)          | 1.938(3)   | Zn(1)-N(1)          | 2.077(4)   |
| Zn(1)-N(2)                                                                       | 2.054(4)   |                     |            |                     |            |
| O(3)#2-Zn(1)-O(1)                                                                | 105.73(14) | O(3)#2-Zn(1)-N(2)   | 122.21(13) | O(1)-Zn(1)-N(2)     | 113.40(13) |
| O(3)#2-Zn(1)-N(1)                                                                | 107.22(15) | O(1)-Zn(1)-N(1)     | 127.96(15) | N(2)-Zn(1)-N(1)     | 80.25(18)  |
| Symmetry code: #1 x,-y,z+1/2; #2 x,-y,z-1/2; #3 -x+1/2,-y-1/2,-z; #4 -x,y,-z+1/2 |            |                     |            |                     |            |
| <b>Complex 8</b>                                                                 |            |                     |            |                     |            |
| O(1W)-Ni(1)                                                                      | 2.049(4)   | N(1)-Ni(1)          | 2.066(5)   | N(2)-Ni(1)          | 2.030(5)   |
| Ni(1)-O(1)                                                                       | 2.045(4)   | Ni(1)-O(3)#3        | 2.082(4)   | Ni(1)-O(4)#3        | 2.122(4)   |
| O(3)#1-Ni(1)                                                                     | 2.082(4)   | O(4)-Ni(1)#1        | 2.122(4)   | N(2)-Ni(1)-O(1)     | 98.11(19)  |
| N(2)-Ni(1)-O(1W)                                                                 | 97.05(19)  | O(1)-Ni(1)-O(1W)    | 92.78(16)  | N(2)-Ni(1)-N(1)     | 79.8(2)    |
| O(1)-Ni(1)-N(1)                                                                  | 177.45(19) | O(1W)-Ni(1)-N(1)    | 88.96(18)  | N(2)-Ni(1)-O(3)#3   | 162.91(18) |
| O(1)-Ni(1)-O(3)#3                                                                | 90.84(16)  | O(1W)-Ni(1)-O(3)#3  | 97.02(17)  | N(1)-Ni(1)-O(3)#3   | 90.79(19)  |
| N(2)-Ni(1)-O(4)#3                                                                | 102.56(17) | O(1)-Ni(1)-O(4)#3   | 89.91(15)  | O(1W)-Ni(1)-O(4)#3  | 159.62(17) |
| N(1)-Ni(1)-O(4)#3                                                                | 89.10(18)  | O(3)#3-Ni(1)-O(4)#3 | 62.73(15)  |                     |            |
| Symmetry code: #1 x,-y+1,z-1/2; #2 -x+1/2,-y+1/2,-z+1; #3 x,-y+1,z+1/2           |            |                     |            |                     |            |

| Complex 9                                                                    |            |                    |            |                  |            |
|------------------------------------------------------------------------------|------------|--------------------|------------|------------------|------------|
| Cu(1)-O(4)#1                                                                 | 1.959(19)  | Cu(1)-O(1)         | 1.977(2)   | Cu(1)-N(1)       | 2.028(2)   |
| Cu(1)-N(2)                                                                   | 2.070(2)   | Cu(1)-O(1W)        | 2.296(2)   |                  |            |
| O(4)#1-Cu(1)-O(1)                                                            | 97.28(9)   | O(4)#1-Cu(1)-N(1)  | 170.89(9)  | O(1)-Cu(1)-N(1)  | 91.84(10)  |
| O(4)#1-Cu(1)-N(2)                                                            | 90.98(9)   | O(1)-Cu(1)-N(2)    | 155.28(9)  | O(1)-Cu(1)-N(2)  | 155.28(9)  |
| N(1)-Cu(1)-N(2)                                                              | 80.67(10)  | O(4)#1-Cu(1)-O(1W) | 92.06(9)   | O(1)-Cu(1)-O(1W) | 97.78(9)   |
| N(1)-Cu(1)-O(1W)                                                             | 86.65(10)  | N(2)-Cu(1)-O(1W)   | 105.19(9)  |                  |            |
| Symmetry code: #1 -x+1,y-1/2,-z+3/2; #2 -x+1,y+1/2,-z+3/2; #3 -x+1,-y+1,-z+2 |            |                    |            |                  |            |
| Complex 10                                                                   |            |                    |            |                  |            |
| O(4)-Zn(1)                                                                   | 2.001 (3)  | O(1)-Zn(1)         | 2.009(3)   | OW-Zn(1)         | 2.053(3)   |
| N(3)-Zn(1)                                                                   | 2.150(3)   | N(2)-Zn(1)         | 2.200(4)   | O(4)-Zn(1)-O(1)  | 103.76(12) |
| O(4)-Zn(1)-OW                                                                | 102.19(13) | O(1)-Zn(1)-OW      | 97.17(15)  | O(4)-Zn(1)-N(3)  | 146.22(12) |
| O(1)-Zn(1)-N(3)                                                              | 90.59(12)  | OW-Zn(1)-N(3)      | 106.18(13) | O(4)-Zn(1)-N(2)  | 88.46(13)  |
| O(1)-Zn(1)-N(2)                                                              | 166.20(12) | OW-Zn(1)-N(2)      | 86.29(15)  | N(3)-Zn(1)-N(2)  | 75.62(13)  |

Table S2 Selected hydrogen bonds (Å) of compounds H<sub>4</sub>L and 1-10

| D-H...A          | D-H (Å) | H...A (Å) | D...A (Å) | DHA (deg) | Symmetry code            |
|------------------|---------|-----------|-----------|-----------|--------------------------|
| H <sub>4</sub> L |         |           |           |           |                          |
| N1-H1...O1       | 0.894   | 2.540     | 3.269     | 139.09    | [ x+1, -y+3/2, z-1/2 ]   |
| N2-H2...O7       | 0.874   | 2.527     | 3.310     | 149.49    | [ x-1, -y+3/2, z+1/2 ]   |
| O1-H1C...O5      | 0.815   | 1.834     | 2.649     | 177.56    | [ -x+1, -y+1, -z+1 ]     |
| O6-H6A...O2      | 0.818   | 1.786     | 2.602     | 174.02    | [ -x+1, -y+1, -z+1 ]     |
| O8-H8...O4       | 0.819   | 1.783     | 2.593     | 169.65    | [ -x+2, -y+1, -z ]       |
| O3-H3A...O7      | 0.822   | 1.798     | 2.618     | 175.87    | [ -x+2, -y+1, -z ]       |
| Complex 1        |         |           |           |           |                          |
| O4-H4...O7       | 0.82    | 1.85      | 2.657(4)  | 169.0     | [ x-1/2, -y+1, z-1/2 ]   |
| O5-H5...O8       | 0.82    | 1.85      | 2.619(4)  | 156.0     | [ x+1/2, -y+1, z+1/2 ]   |
| Complex 2        |         |           |           |           |                          |
| O2W-H2WB...N3    | 0.868   | 2.371     | 3.112     | 143.37    | [ x, y, z+1 ]            |
| O2W-H2WA...O4    | 0.871   | 2.223     | 3.067     | 163.32    | [ -x+1, -y+1, -z+1 ]     |
| Complex 3        |         |           |           |           |                          |
| O1W-H1WA...O4    | 0.835   | 2.336     | 2.758     | 111.88    | [ -x+1/2, -y+1/2, -z ]   |
| O1W-H1WA...O1    | 0.835   | 2.574     | 3.384     | 163.69    | [ x, -y, z-1/2 ]         |
| O2W-H2WB...O1    | 0.838   | 2.062     | 2.860     | 159.07    | [ x, -y, z-1/2 ]         |
| O3W-H3WB...O2    | 0.820   | 1.956     | 2.765     | 169.00    | [ x, -y, z+1/2 ]         |
| O4W-H4WB...O3    | 0.836   | 2.208     | 2.881     | 137.53    |                          |
| Complex 4        |         |           |           |           |                          |
| N1-H1A...O6W     | 0.860   | 2.540     | 3.388     | 168.94    | [ -x+1/2, -y+1/2, -z+2 ] |
| O1W-H1WB...O4    | 0.831   | 1.959     | 2.783     | 171.59    | [ -x+1/2, -y+1/2, -z+1 ] |
| O3W-H3WA...O2    | 0.836   | 1.894     | 2.720     | 169.58    | [ x, -y, z-1/2 ]         |
| O1W-H1WA...O5W   | 0.833   | 2.096     | 2.739     | 133.80    |                          |
| O2W-H2WA...O3    | 0.805   | 1.938     | 2.740     | 174.22    | [ -x+1/2, -y+1/2, -z+2 ] |
| O3W-H3WB...O4W   | 0.835   | 2.099     | 2.896     | 159.64    |                          |

|                   |         |         |          |        |                           |
|-------------------|---------|---------|----------|--------|---------------------------|
| O4W-H4WB...O1     | 0.841   | 1.962   | 2.769    | 160.39 | [ -x+1/2, -y+1/2, -z+1 ]  |
| O4W-H4WA...O5W    | 0.848   | 2.186   | 2.620    | 111.68 | [ -x+1/2, -y+1/2, -z+1 ]  |
| O4W-H4WA...O1     | 0.848   | 2.504   | 3.058    | 123.83 |                           |
| O2W-H2WB...O6W    | 0.800   | 2.315   | 3.064    | 156.07 |                           |
| <b>Complex 5</b>  |         |         |          |        |                           |
| O1W-H1WA...O5W    | 0.892   | 2.446   | 2.985    | 119.32 |                           |
| O3W-H3WA...O6W    | 0.893   | 2.031   | 2.735    | 134.77 |                           |
| O2W-H2WB...O4W    | 0.892   | 2.186   | 2.913    | 138.27 | [ -x+1/2, -y+1/2, -z+1 ]  |
| O3W-H3WB...O3     | 0.881   | 2.003   | 2.787    | 147.67 | [ -x+1/2, -y+1/2, -z+1 ]  |
| O2W-H2WA...O1     | 0.900   | 1.935   | 2.718    | 144.43 | [ x, -y, z+1/2 ]          |
| O1W-H1WB...O4     | 0.889   | 1.974   | 2.741    | 143.58 | [ -x+1/2, -y+1/2, -z ]    |
| O4W-H4WB...N1     | 0.814   | 2.239   | 2.975    | 150.58 | [ -x+1/2, -y+1/2, -z ]    |
| O4W-H4WA...O2     | 0.821   | 2.367   | 3.055    | 141.72 | [ -x+1/2, -y+1/2, -z+1 ]  |
| <b>Complex 6</b>  |         |         |          |        |                           |
| N1-H1...O4        | 0.925   | 2.218   | 2.993    | 140.83 | [ -x+1/2, y-1/2, -z+1/2 ] |
| <b>Complex 7</b>  |         |         |          |        |                           |
| N3-H3B...O1       | 0.860   | 2.160   | 2.930    | 148.84 | [ -x+1/2, y-1/2, -z+1/2 ] |
| <b>Complex 8</b>  |         |         |          |        |                           |
| N3-H3...O1        | 0.860   | 2.327   | 3.186    | 177.45 | [ -x+1/2, y-1/2, -z+1/2 ] |
| O1W-H1WB...O2     | 0.860   | 1.849   | 2.562    | 139.09 |                           |
| O1W-H1WA...O3W    | 0.829   | 2.312   | 2.953    | 134.44 | [ x, -y+1, z-1/2 ]        |
| <b>Complex 9</b>  |         |         |          |        |                           |
| O1W-H1WB...O3     | 0.85    | 2.36    | 2.966(3) | 128    | [1-x, -0.5+y, 1.5-z]      |
| O1W-H1WB...O1     | 0.85    | 2.41    | 3.042(4) | 132    | [-x, 1-y, 1-z]            |
| O1W-H1WA...O3     | 0.85    | 2.21    | 2.904(4) | 139    | [-1+x, 1.5-y, -0.5+z]     |
| N3-H3A...O2       | 0.86    | 2.26    | 2.936(3) | 136.0  | [x, -y+3/2, z+1/2]        |
| N3-H3A...N1       | 0.86    | 2.59    | 3.198(3) | 129.0  | [x, -y+3/2, z+1/2]        |
| <b>Complex 10</b> |         |         |          |        |                           |
| N1-H13...O3       | 0.89(4) | 2.02(4) | 2.886(5) | 164(4) | [-0.5+x, 0.5-y, -0.5+z]   |
| OW-HWB...O2       | 0.91(6) | 1.76(6) | 2.671(5) | 172(6) | [-0.5+x, 0.5-y, 0.5+z]    |
| OW-HWB...O4       | 0.72(5) | 2.25(4) | 2.808(5) | 135(4) | [-x, -y, -z]              |

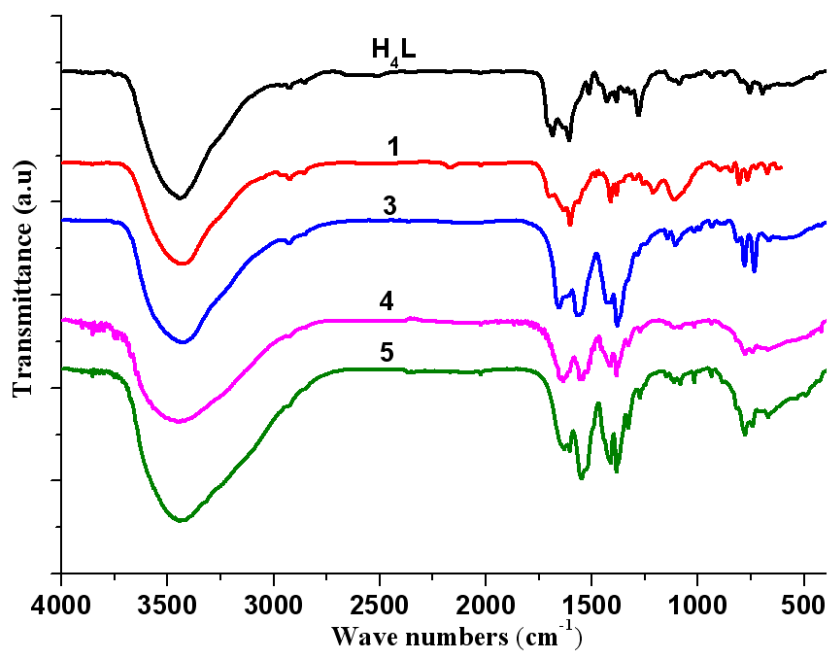

Fig. S1 IR spectra of compounds H<sub>4</sub>L, 1, 3, 4 and 5

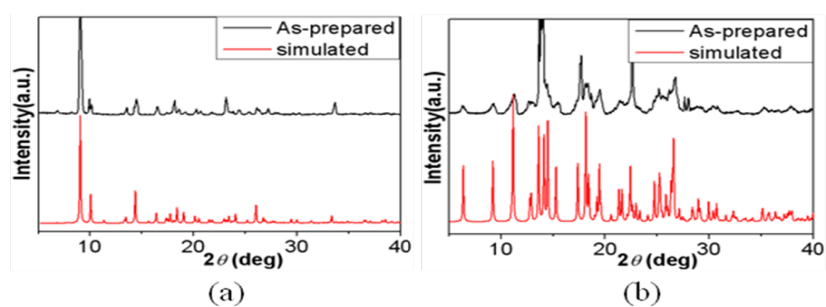

Fig. S2 Comparison of XRPD patterns for complexes 3 (a) and 6 (b).

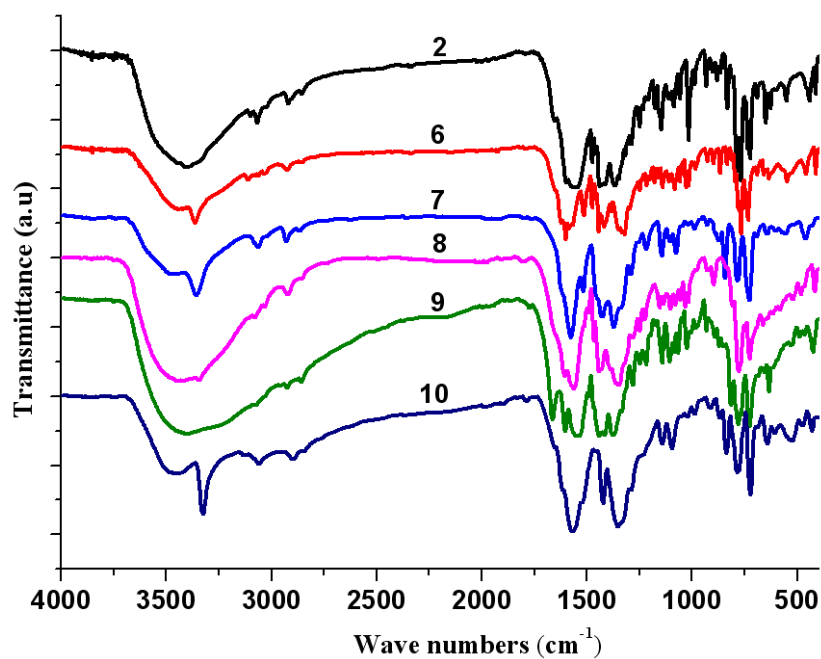

Fig. S3 IR spectra of compound 2, 6, 7, 8, 9 and 10.

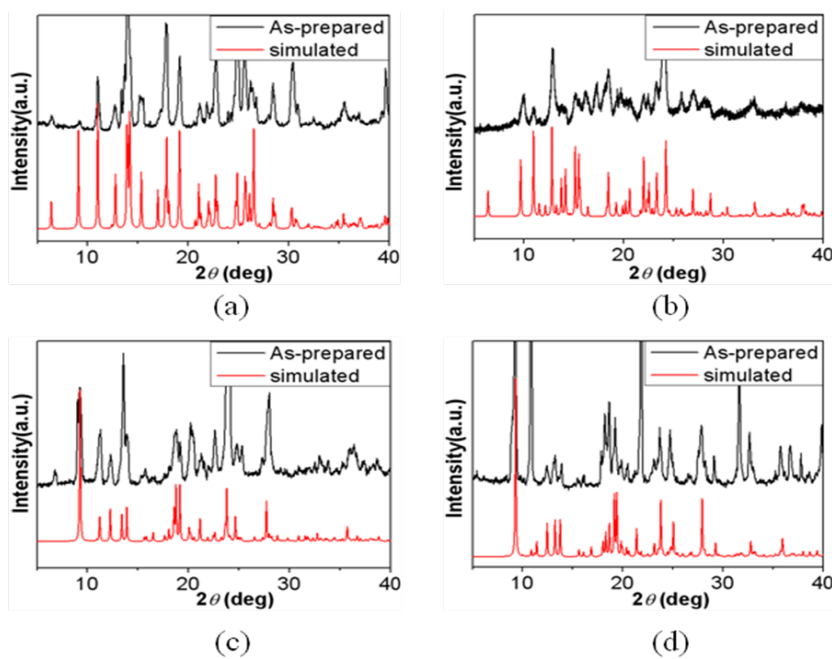

Fig. S4 Comparison of XRPD patterns for complexes 7 (a), 8 (b), 9 (c) and 10 (d).

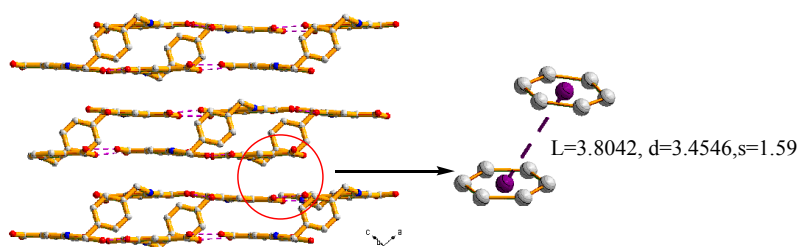

**Fig. S5** The 2D supramolecular structure of H<sub>4</sub>L formed by  $\pi \cdots \pi$  stacking interactions

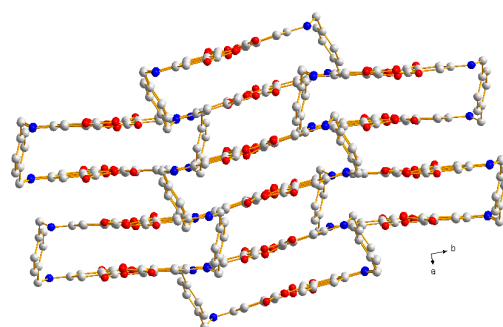

**Fig. S6** The 3D supramolecular structure of H<sub>4</sub>L formed by strong hydrogen-bonds between layers.

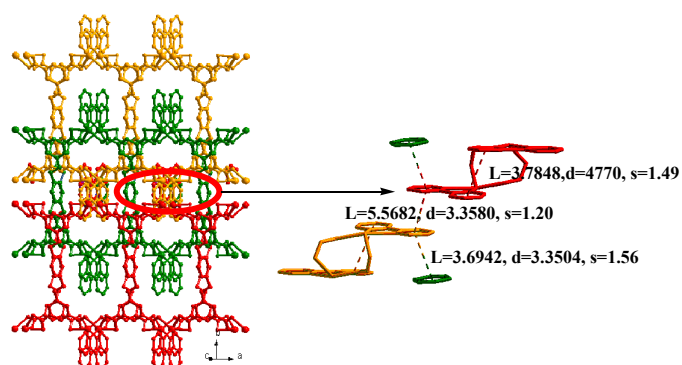

**Fig. S7** Packing of three 2D layers of complex **2** to generate a 3D supramolecular framework by  $\pi \cdots \pi$  stacking (different layers denoted in different colors).

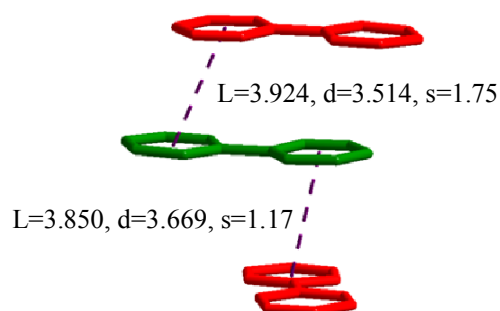

**Fig. S8** The 3D supramolecular structure of **6** by interlayer  $\pi \cdots \pi$  stacking (different layers denoted in different colors).

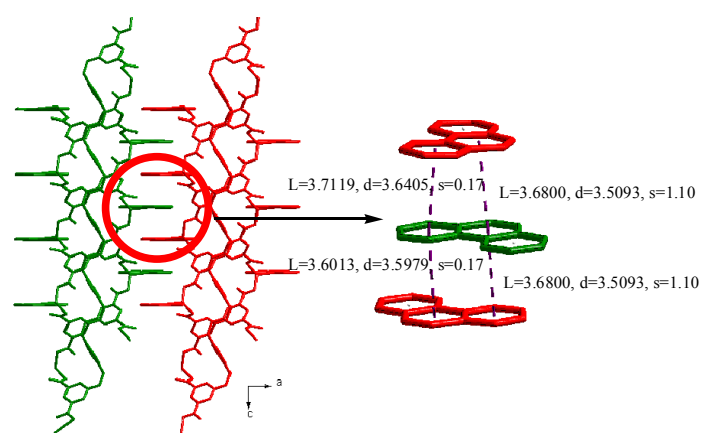

**Fig. S9** The 3D supramolecular structure of 7 by interlayer  $\pi \cdots \pi$  stacking (different layers denoted in different colors).

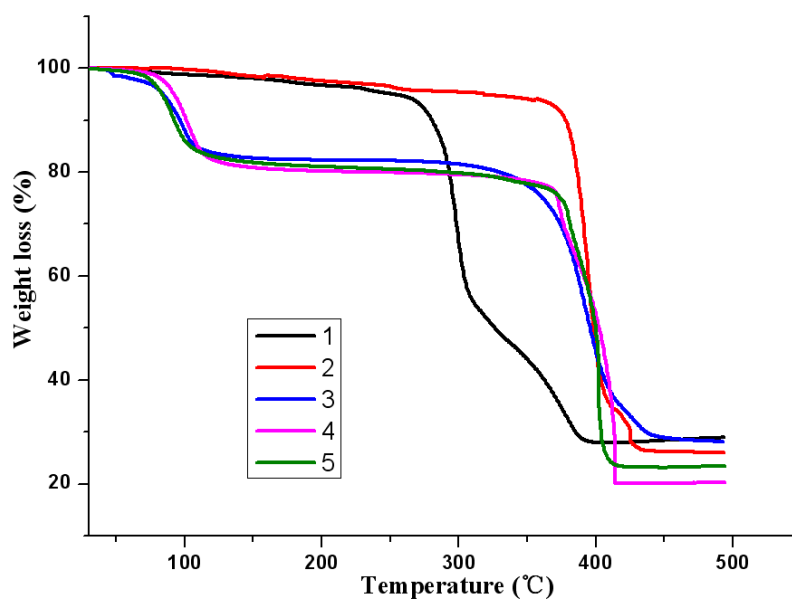

**Fig. S10** TGA curves for complexes 1-5.



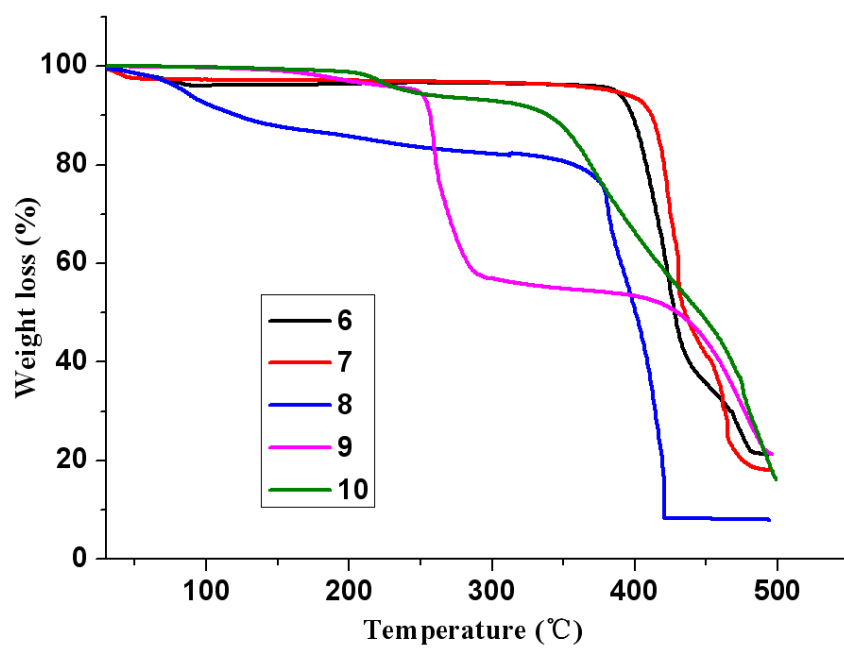

Fig. S11 TGA curves for complexes 6-10.

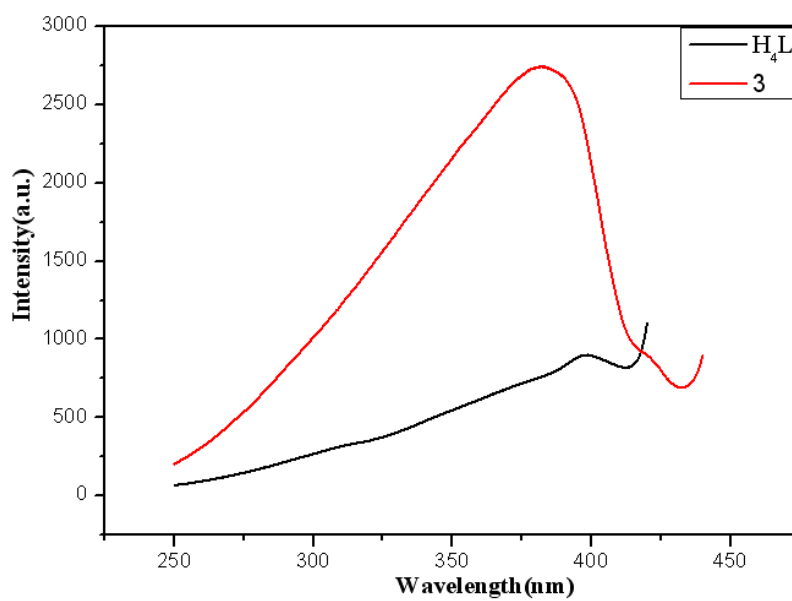

Fig. S12 The excitation spectra of H<sub>4</sub>L and 3

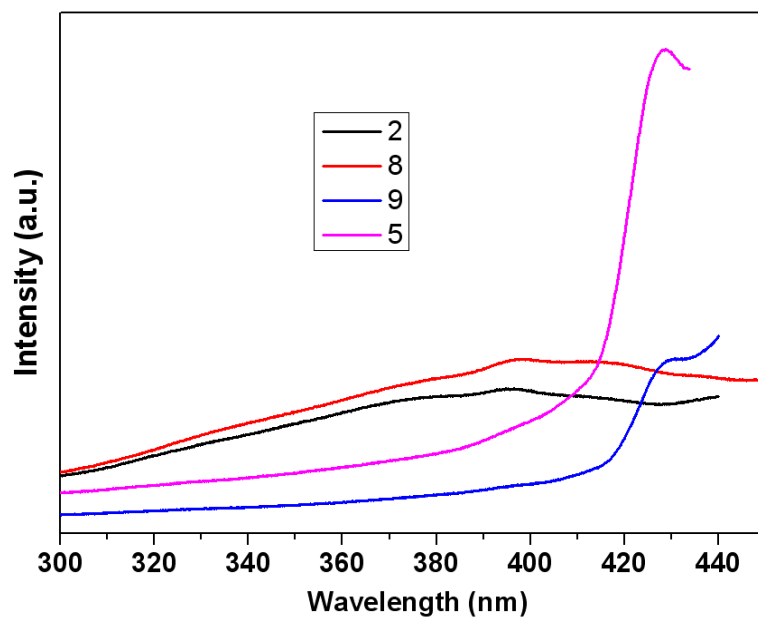

Fig. S13 The excitation spectra of complexes 2, 5, 8 and 9
